# Supplementary material for: Posttranscriptional Regulation of the Human ABCG2 Multidrug Transporter Protein by Artificial Mirtrons
Source: MDPI journal article supplement (doi:10.3390/genes12071068), 2021-07-13

# Untransfected HeLa cells

20x magnification

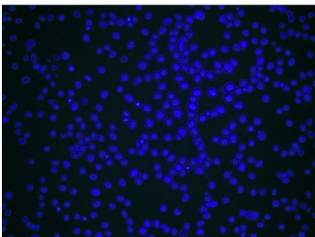

Cell nuclei  
staining  
(Hoechst fluorescence)

40x magnification

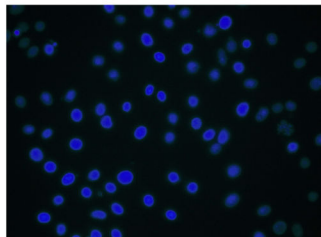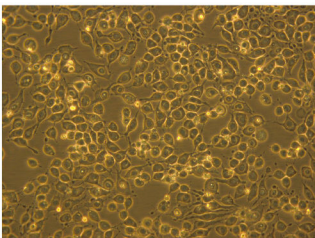

brightfield

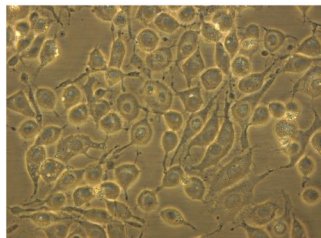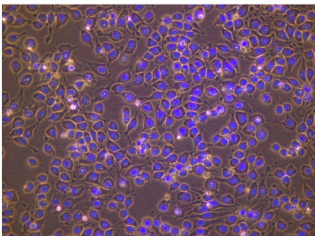

overlayed

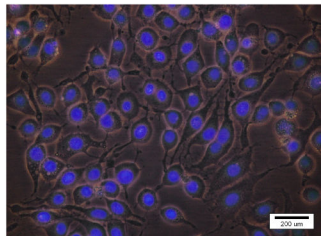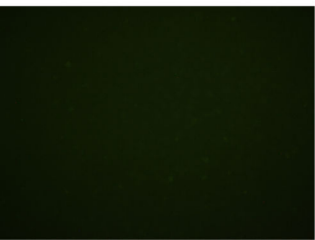

"GFP"  
autofluorescence

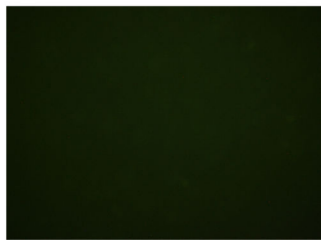

Supplement: s1 [file s1]
