# Supplementary material for: Posttranscriptional Regulation of the Human ABCG2 Multidrug Transporter Protein by Artificial Mirtrons
Source: MDPI journal article supplement (doi:10.3390/genes12071068), 2021-07-13
Supplement: s1 [file s1]

## Sequencing of spliced products

[illegible]
