# Supplementary material for: Posttranscriptional Regulation of the Human ABCG2 Multidrug Transporter Protein by Artificial Mirtrons
Source: MDPI journal article supplement (doi:10.3390/genes12071068), 2021-07-13

A

&gt;EGFPm\_art3

ATGGTGAGCAAGGGGCGAGGAGCTGTTACCGGGGTGGTGCCCATCCTGGTTCGAG  
 CTGGACGGCGACGTAAACGGCCACAAGTTCAGCGTGTCCGGCGAGGGGCGAGGGC  
 GATGCCACCTACGGCAAGCTGACCCTGAAGTTCATCTGCACCACCGGCAAGCTGC  
 CCGTGCCCTGGCCACCCTCGTGACCACCCTGACCTACGGCGTGCAGTGCTTCAG  
 CCGCTACCCCGACCACATGAAGCAGCACGACTTCTTCAAGTCCGCCATGCCCGAA  
 GGCTACGTCCAGGAGCGCACCATCTTCTTCAAGGACGACGGCAACTACAAGACCC  
 GCGCCGAGGTGAAGTTCGAGGGGCGACACCCTGGTGAACCGCATCGAGCTGAAGG  
 GCATCGACTTCAAGGAGGACGGCAACATCCTGGGGCACAAGCTGGAGTACAAC  
 ACAACAGCCACAACGTCTATATCATGGCCGACAAGCAGAAGAACGGCATCAAGG  
 TGAAGTTCAAGATCCGCCACAACATCGAGGACGGCAGCGTGCAGGTAAACATCA  
 TAACGAAGAAGGGTAGCATCATTAGAGCCAGAGCTCTGTCTCAGCTCCCTTCTTC  
 CTTATCATCTTTTCAGCTGGCCGACCACTACCAGCAGAACACCCCCATCGGCGACG  
 GCCCCGTGCTGCTGCCCGACAACCACTACCTGAGCACCCAGTCCGCCCTGAGCAA  
 AGACCCCAACGAGAAGCGCGATCACATGGTCCTGCTGGAGTTCGTGACCGCCGCC  
 GGGATCACTCTCGGCATGGACGAGCTGTACAAGTAA

B

Acceptor (AG) sites. Threshold 0.000 (100%).  
 1 P: 210 W: 4.10 Seq: tacggcggtgcAGtgcttcagcc  
 2 P: 306 W: 0.23 Seq: atcttcttcaAGgacgacggca  
**3 P: 614 W: 11.43 Seq: atcatctttcAGctggccgacc**  
 4 P: 635 W: 0.10 Seq: cactaccagcAGaacacccccca  
 Donor (GT) sites. Threshold 0.079 (100%).  
 1 P: 4 W: 10.02 Seq: -----atgGTgagcaagggc  
 2 P: 67 W: 3.30 Seq: ggacggcgacGTaaacggccac  
 3 P: 337 W: 5.96 Seq: ccgcgcgcgagGTgaagtccgag  
 4 P: 361 W: 1.90 Seq: cgacaccctgGTgaaccgcatc  
 5 P: 490 W: 6.94 Seq: cggcatcaagGTgaacttcaag  
**6 P: 535 W: 12.40 Seq: cagcgtgcagGTaaacatcata**  
 7 P: 557 W: 1.62 Seq: acgaagaaggGTtagcatcatta  
 8 P: 797 W: 4.10 Seq: agctgtacaaGTaa-----

C

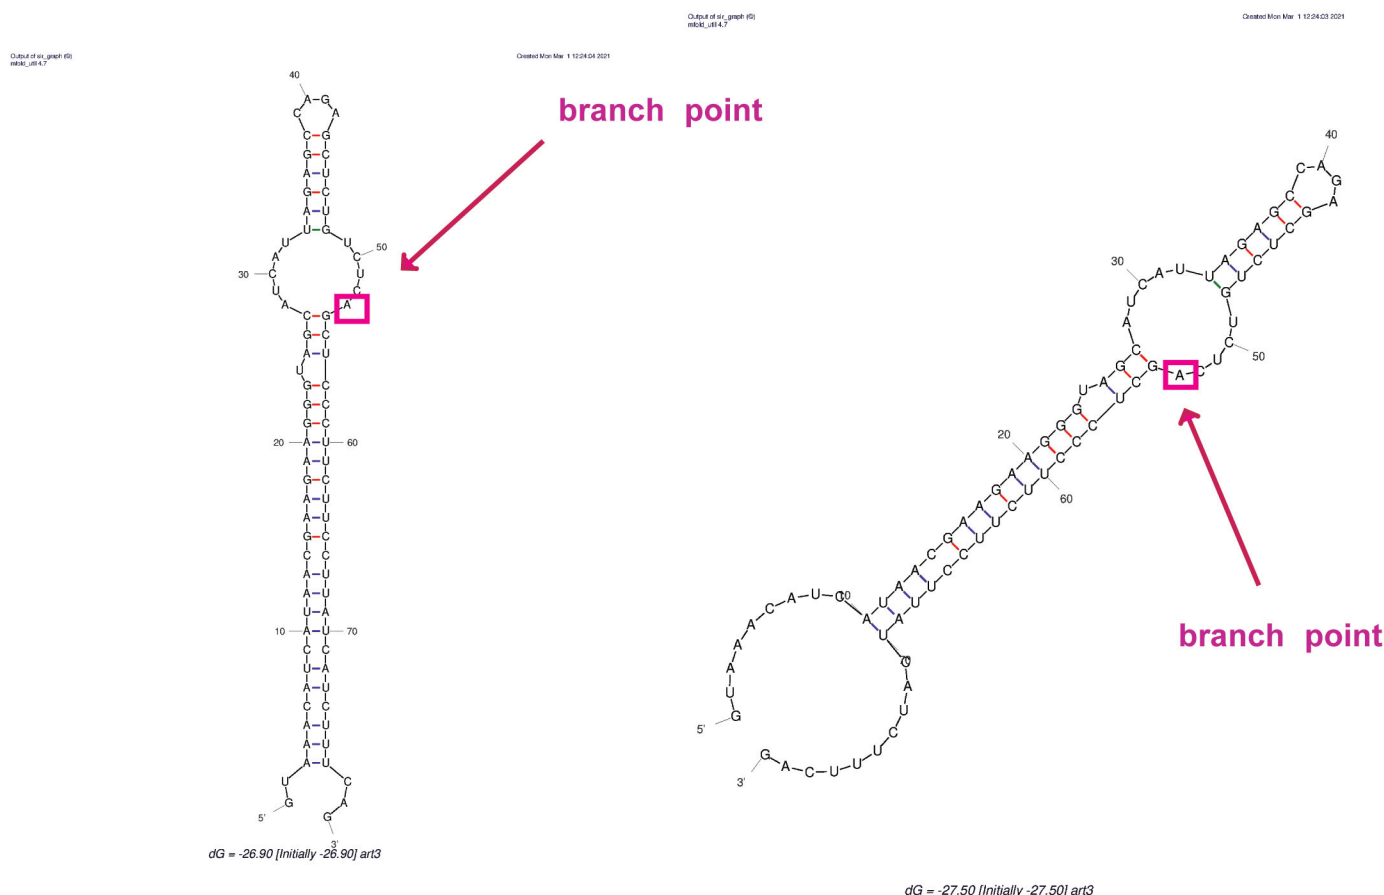

Supplement: s1 [file s1]
